# Supplementary material for: Language Ability after Early Detection of Permanent Childhood Hearing Impairment
Source: Atypon-hosted journal article supplement (doi:10.1056/nejmoa054915), 2006-05-17
Supplement: nejm_kenn_2131_sa1.pdf [file nejm_kenn_2131_sa1.pdf]

## Supplementary Appendix

This appendix has been provided by the authors to give readers additional information about their work.

Supplement to: Kennedy CR, McCann DC, Campbell MJ, et al. Language ability after early detection of permanent childhood hearing impairment. *N Engl J Med* 2006;354:2131-41.

WEB-ONLY Table 1: Timing of confirmation of permanent childhood hearing impairment and language scores in children in the Wessex controlled trial of Universal Newborn Screening

| Measure                                | n confirmation |            | mean <sup>+</sup> z score (SD) confirmation |                 | unadjusted mean difference (a-b) and 95% CI | P     | adjusted* mean difference (a-b) and 95% CI | P     |
|----------------------------------------|----------------|------------|---------------------------------------------|-----------------|---------------------------------------------|-------|--------------------------------------------|-------|
|                                        | ≤ 9 months     | > 9 months | a<br>≤ 9 months                             | b<br>> 9 months |                                             |       |                                            |       |
| <i>Receptive Language</i>              |                |            |                                             |                 |                                             |       |                                            |       |
| <b>TROG</b>                            | 15             | 26         | -1.53 (1.78)                                | -2.21 (1.98)    | 0.68 (-0.57 to 1.93)                        | 0.278 | 1.07 (0.06 to 2.08)                        | 0.039 |
| <b>BPVS</b>                            | 15             | 26         | -1.80 (1.73)                                | -2.08 (1.53)    | 0.29 (-0.76 to 1.34)                        | 0.582 | 0.69 (-0.16 to 1.54)                       | 0.108 |
| <b>Aggregate score</b>                 | 15             | 26         | -1.66 (1.68)                                | -2.15 (1.69)    | 0.48 (-0.62 to 1.59)                        | 0.381 | 0.88 (0.02 to 1.74)                        | 0.046 |
| <b>Aggregate minus non-verbal</b>      | 15             | 26         | -1.15 (1.64)                                | -1.62 (1.65)    | 0.47 (-0.61 to 1.55)                        | 0.384 | 0.92 (0.06 to 1.77)                        | 0.037 |
| <i>Expressive Language</i>             |                |            |                                             |                 |                                             |       |                                            |       |
| <b>Bus Story: Sentence information</b> | 13             | 23         | -0.39 (1.46)                                | -1.16 (1.29)    | 0.77 (-0.19 to 1.72)                        | 0.111 | 0.92 (0.18 to 1.65)                        | 0.016 |
| <b>Bus Story: 5 longest sentences</b>  | 13             | 23         | -0.20 (1.85)                                | -0.76 (1.41)    | 0.56 (-0.56 to 1.67)                        | 0.320 | 0.76 (-0.23 to 1.76)                       | 0.127 |
| <b>Aggregate score</b>                 | 13             | 23         | -0.30 (1.61)                                | -0.96 (1.24)    | 0.66 (-0.31 to 1.63)                        | 0.178 | 0.84 (0.04 to 1.64)                        | 0.041 |
| <b>Aggregate minus non-verbal</b>      | 13             | 23         | -0.003 (1.80)                               | -0.44 (1.27)    | 0.44 (-0.61 to 1.47)                        | 0.406 | 0.83 (-0.02 to 1.67)                       | 0.055 |

The group mean score and standard deviations ( $SD_N$ ) scores in children with normal hearing were used to derive z-scores for the children with PCHI, equal to the number of  $SD_N$  by which their age-adjusted score differed from the mean score in children with normal hearing. Negative group mean z-scores indicate that scores were lower than those seen in the normally hearing comparison group (see Methods). TROG = Test of Reception of Grammar; BPVS = British Picture Vocabulary Scale.

<sup>+</sup> Mean scores are adjusted for age at assessment.

\* Difference between mean scores adjusted, in a linear regression model, for severity of PCHI, maternal educational qualifications and, except in the case of mean difference scores (see Methods), age-adjusted total Ravens Colored Progressive Matrices scores.

controlled trial of Universal Newborn Screening

|                                        | n      |     | mean <sup>+</sup> z score |              | unadjusted mean difference (a-b) and 95% CI | P     | adjusted* mean difference (a-b) and 95% CI | P     |
|----------------------------------------|--------|-----|---------------------------|--------------|---------------------------------------------|-------|--------------------------------------------|-------|
|                                        | No UNS | UNS | a No UNS                  | b UNS        |                                             |       |                                            |       |
| <i>Receptive Language</i>              |        |     |                           |              |                                             |       |                                            |       |
| <b>TROG</b>                            | 20     | 21  | -2.29 (1.87)              | -1.65 (1.95) | 0.64 (-0.57 to 1.85)                        | 0.291 | 0.87 (-0.17 to 1.91)                       | 0.098 |
| <b>BPVS</b>                            | 20     | 21  | -2.26 (1.41)              | -1.71 (1.73) | 0.55 (-0.45 to 1.55)                        | 0.275 | 0.64 (-0.22 to 1.50)                       | 0.141 |
| <b>Aggregate score</b>                 | 20     | 21  | -2.27 (1.57)              | -1.68 (1.77) | 0.59 (-0.47 to 1.65)                        | 0.264 | 0.76 (-0.13 to 1.64)                       | 0.092 |
| <b>Aggregate minus non-verbal</b>      | 20     | 21  | -1.96 (1.46)              | -0.96 (1.69) | 1.00 (0.001 to 2.00)                        | 0.050 | 0.79 (-0.08 to 1.67)                       | 0.075 |
| <i>Expressive Language</i>             |        |     |                           |              |                                             |       |                                            |       |
| <b>Bus Story: Sentence information</b> | 17     | 19  | -0.91 (1.36)              | -0.85 (1.43) | 0.06 (-0.89 to 1.01)                        | 0.894 | -0.02 (-0.83 to 0.79)                      | 0.966 |
| <b>Bus Story: 5 longest sentences</b>  | 17     | 19  | -0.81 (1.68)              | -0.33 (1.49) | 0.48 (-0.60 to 1.55)                        | 0.376 | 0.43 (-0.59 to 1.45)                       | 0.394 |
| <b>Aggregate score</b>                 | 17     | 19  | -0.86 (1.50)              | -0.59 (1.33) | 0.27 (-0.69 to 1.23)                        | 0.573 | 0.21 (-0.65 to 1.06)                       | 0.625 |
| <b>Aggregate minus non-verbal</b>      | 17     | 19  | -0.54 (1.19)              | -0.04 (1.68) | 0.50 (-0.50 to 1.50)                        | 0.319 | 0.28 (-0.61 to 1.16)                       | 0.525 |

The group mean score and standard deviations ( $SD_N$ ) scores in children with normal hearing were used to derive z-scores for the children with PCHI, equal to the number of  $SD_N$  by which their age-adjusted score differed from the mean score in children with normal hearing. Negative group mean z-scores indicate that scores were lower than those seen in the normally hearing comparison group (see Methods). TROG = Test of Reception of Grammar; BPVS = British Picture Vocabulary Scale.

<sup>+</sup> Mean scores are adjusted for age at assessment.

\* Difference between mean scores adjusted, in a linear regression model, for severity of PCHI, maternal educational qualifications and, except in the case of mean difference scores (see Methods), age-adjusted total Ravens Colored Progressive Matrices scores.
